# Supplementary material for: A Preliminary Approach to Define the Microbiological Profile of Naturally Fermented Peranzana Alta Daunia Table Olives
Source: MDPI journal article supplement (doi:10.3390/foods11142100), 2022-07-14
Supplement: s1 [file s1]

**Table S1.** Median value of Growth Index values at 48 h of lactobacilli in presence of NaCl (6, 8, and 10%), at 10 and 45°C. Input data for two way-joining reported in Figure 2.

|   | GI-6%NaCl | GI-8% NaCl | GI-10%NaCl | GI-10 °C | GI-45 °C | Number of isolates used for the experiments |
|---|-----------|------------|------------|----------|----------|---------------------------------------------|
| A | 93        | 80         | 65         | 65       | 44       | 10                                          |
| B | 97        | 82         | 63         | 66       | 42       | 9                                           |
| C | 99        | 83         | 56         | 64       | 45       | 8                                           |
| D | 103       | 78         | 62         | 61       | 39       | 11                                          |
| E | 102       | 74         | 59         | 69       | 39       | 7                                           |
| F | 95        | 79         | 54         | 68       | 38       | 12                                          |
| G | 99        | 71         | 55         | 64       | 37       | 9                                           |
| H | 101       | 77         | 45         | 56       | 43       | 11                                          |
| I | 100       | 69         | 43         | 55       | 44       | 7                                           |
| L | 102       | 68         | 47         | 60       | 39       | 8                                           |
| M | 100       | 39         | 18         | 32       | 38       | 8                                           |
| N | 103       | 55         | 23         | 43       | 47       | 9                                           |
| O | 104       | 58         | 25         | 42       | 42       | 7                                           |
| P | 105       | 54         | 22         | 39       | 41       | 6                                           |
| Q | 102       | 52         | 18         | 37       | 49       | 12                                          |
